# Supplementary material
Source: PubMed Central journal article supplement (PMC6231027)
Supplement: wxy080_suppl_supplementary_material.pdf [file wxy080_suppl_supplementary_material.pdf]

## Online supplementary material

### Title: Use and reliability of exposure assessment methods in occupational case-control studies in the general population – past, present, and future

Authors: Calvin B Ge<sup>1</sup>, Melissa C Friesen<sup>2</sup>, Hans Kromhout<sup>1</sup>, Susan Peters<sup>1,3</sup>, Nathaniel Rothman<sup>2</sup>, Qing Lan<sup>2</sup>, Roel Vermeulen<sup>1,4</sup>

Author affiliations:

<sup>1</sup> Institute for Risk Assessment Sciences, Utrecht University, Utrecht, Netherlands

<sup>2</sup> Occupational and Environmental Epidemiology Branch, Division of Cancer Epidemiology and Genetics, National Cancer Institute, Bethesda, USA

<sup>3</sup> Department of Neurology, University Medical Centre Utrecht, Utrecht, Netherlands

<sup>4</sup> Julius Center for Health Sciences and Primary Care, University Medical Center Utrecht, Utrecht, The Netherlands

Table S1: List of included case-control occupational cancer studies in the general population

| Lead Author    | Year | Country /Regions | Title                                                                                                                                                                  | Journal Abbreviation | Pages   | Issue | Volume     |
|----------------|------|------------------|------------------------------------------------------------------------------------------------------------------------------------------------------------------------|----------------------|---------|-------|------------|
| Adegoke        | 2004 | China            | Agreement of job-exposure matrix (JEM) assessed exposure and self-reported exposure among adult leukemia patients and controls in Shanghai                             | Am. J. Ind. Med.     | 281-288 | 3     | 45         |
| Adegoke        | 2003 | China            | Occupational history and exposure and the risk of adult leukemia in Shanghai                                                                                           | Ann Epidemiol        | 485-494 | 7     | 13         |
| Agudo          | 2000 | Spain            | Occupation and risk of malignant pleural mesothelioma: A case-control study in Spain                                                                                   | Am. J. Ind. Med.     | 159-168 | 2     | 37         |
| Aguilar-Madrid | 2010 | Mexico           | Case-control study of pleural mesothelioma in workers with social security in Mexico                                                                                   | Am. J. Ind. Med.     | 241-251 | 3     | 53         |
| Ahrens         | 1993 | Germany          | Retrospective assessment of asbestos exposure--I. Case-control analysis in a study of lung cancer: efficiency of job-specific questionnaires and job exposure matrices | Int J Epidemiol      | S83-95  |       | 22 Suppl 2 |

|            |      |                |                                                                                                                                                             |                             |           |    |     |
|------------|------|----------------|-------------------------------------------------------------------------------------------------------------------------------------------------------------|-----------------------------|-----------|----|-----|
| Ahrens     | 2007 | EU             | Occupational exposure to endocrine-disrupting compounds and biliary tract cancer among men                                                                  | Scand J Work Environ Health | 387-396   | 5  | 33  |
| Ajani      | 1992 | US             | Occupation and risk of uveal melanoma. An exploratory study                                                                                                 | Cancer                      | 2891-2900 | 12 | 70  |
| Arbman     | 1993 | Sweden         | Do occupational factors influence the risk of colon and rectal cancer in different ways?                                                                    | Cancer                      | 2543-2549 | 9  | 72  |
| Aschengrau | 1998 | US             | Occupational exposure to estrogenic chemicals and the occurrence of breast cancer: an exploratory analysis                                                  | Am. J. Ind. Med.            | 6-14      | 1  | 34  |
| Band       | 2011 | Canada         | Prostate cancer risk and exposure to pesticides in British Columbia farmers                                                                                 | Prostate                    | 168-183   | 2  | 71  |
| Baris      | 2004 | US             | Occupation, pesticide exposure and risk of multiple myeloma                                                                                                 | Scand J Work Environ Health | 215-222   | 3  | 30  |
| Becher     | 1993 | Poland         | Effect of occupational air pollutants on various histological types of lung cancer: a population based case-control study                                   | Br J Ind Med                | 136-142   | 2  | 50  |
| Becher     | 2005 | Germany        | Occupation, exposure to polycyclic aromatic hydrocarbons and laryngeal cancer risk                                                                          | Int. J. Cancer              | 451-457   | 3  | 116 |
| Behrens    | 2010 | 9 EU countries | Hormonal exposures and the risk of uveal melanoma                                                                                                           | Cancer Causes Control       | 1625-1634 | 10 | 21  |
| Behrens    | 2012 | Germany        | Pesticide exposure in farming and forestry and the risk of uveal melanoma                                                                                   | Cancer Causes Control       | 141-151   | 1  | 23  |
| Benke      | 1997 | Australia      | Retrospective assessment of occupational exposure to chemicals in community-based studies: validity and repeatability of industrial hygiene panel ratings   | Int J Epidemiol             | 635-642   | 3  | 26  |
| Berrino    | 2003 | EU             | Occupation and larynx and hypopharynx cancer: a job-exposure matrix approach in an international case-control study in France, Italy, Spain and Switzerland | Cancer Causes Control       | 213-223   | 3  | 14  |
| Beveridge  | 2010 | Canada         | Lung cancer risk associated with occupational exposure to nickel, chromium VI, and cadmium in two population-based case-control studies in Montreal         | Am. J. Ind. Med.            | 476-485   | 5  | 53  |
| Bhatti     | 2011 | Canada         | Wood dust exposure and risk of lung cancer                                                                                                                  | Occup Environ Med           | 599-604   | 8  | 68  |
| Black      | 2004 | Australia      | Artificial neural networks and job-specific modules to assess occupational exposure                                                                         | Ann Occup Hyg               | 595-600   | 7  | 48  |
| Blair      | 1993 | US             | Evaluation of risks for non-Hodgkin's lymphoma by occupation and industry exposures from a case-control study                                               | Am. J. Ind. Med.            | 301-312   | 2  | 23  |

|                 |      |                |                                                                                                                                                         |                             |           |    |     |
|-----------------|------|----------------|---------------------------------------------------------------------------------------------------------------------------------------------------------|-----------------------------|-----------|----|-----|
| Blair           | 2001 | US             | Occupation and leukemia: a population-based case-control study in Iowa and Minnesota                                                                    | Am. J. Ind. Med.            | 3-14      | 1  | 40  |
| Boffetta        | 1999 | 7 EU countries | Exposure to environmental tobacco smoke and risk of adenocarcinoma of the lung                                                                          | Int. J. Cancer              | 635-639   | 5  | 83  |
| Boffetta        | 2001 | Canada         | Exposure to titanium dioxide and risk of lung cancer in a population-based study from Montreal                                                          | Scand J Work Environ Health | 227-232   | 4  | 27  |
| Bonassi         | 1989 | Italy          | Bladder cancer and occupational exposure to polycyclic aromatic hydrocarbons                                                                            | Int. J. Cancer              | 648-651   | 4  | 44  |
| Bourgkard       | 2013 | France         | Comparison of exposure assessment methods in a lung cancer case-control study: performance of a lifelong task-based questionnaire for asbestos and PAHs | Occup Environ Med           | 884-891   | 12 | 70  |
| Brandi          | 2013 | Italy          | Asbestos: a hidden player behind the cholangiocarcinoma increase? Findings from a case-control analysis                                                 | Cancer Causes Control       | 911-918   | 5  | 24  |
| Briggs          | 2003 | US             | Occupational risk factors for selected cancers among African American and White men in the United States                                                | Am J Public Health          | 1748-1752 | 10 | 93  |
| Brown           | 1990 | US             | Pesticide exposures and other agricultural risk factors for leukemia among men in Iowa and Minnesota                                                    | Cancer Res.                 | 6585-6591 | 20 | 50  |
| Brown           | 1993 | US             | Pesticide exposures and multiple myeloma in Iowa men                                                                                                    | Cancer Causes Control       | 153-156   | 2  | 4   |
| Brownson        | 1993 | US             | Occupational risk factors for lung cancer among nonsmoking women: a case-control study in Missouri (United States)                                      | Cancer Causes Control       | 449-454   | 5  | 4   |
| Bruske-Hohlfeld | 1999 | Germany        | Lung cancer risk in male workers occupationally exposed to diesel motor emissions in Germany                                                            | Am. J. Ind. Med.            | 405-414   | 4  | 36  |
| Bruske-Hohlfeld | 2000 | Germany        | Occupational lung cancer risk for men in Germany: results from a pooled case-control study                                                              | Am. J. Epidemiol.           | 384-395   | 4  | 151 |
| Cantor          | 1995 | US             | Occupational exposures and female breast cancer mortality in the United States                                                                          | J. Occup. Environ. Med.     | 336-348   | 3  | 37  |
| Carreon         | 2005 | US             | Gliomas and farm pesticide exposure in women: the Upper Midwest Health Study                                                                            | Environ. Health Perspect.   | 546-551   | 5  | 113 |
| Charbotel       | 2006 | France         | Case-control study on renal cell cancer and occupational exposure to trichloroethylene. Part II: Epidemiological aspects                                | Ann Occup Hyg               | 777-787   | 8  | 50  |
| Chatzis         | 1999 | Greece         | Lung cancer and occupational risk factors in Greece                                                                                                     | J. Occup. Environ. Med.     | 29-35     | 1  | 41  |

|             |      |               |                                                                                                                                                                |                                    |           |    |    |
|-------------|------|---------------|----------------------------------------------------------------------------------------------------------------------------------------------------------------|------------------------------------|-----------|----|----|
| Chiu        | 2004 | US            | Agricultural pesticide use, familial cancer, and risk of non-Hodgkin lymphoma                                                                                  | Cancer Epidemiol. Biomarkers Prev. | 525-531   | 4  | 13 |
| Christensen | 2015 | Canada        | Lack of a protective effect of cotton dust on risk of lung cancer: evidence from two population-based case-control studies                                     | BMC Cancer                         | 212       |    | 15 |
| Christensen | 2013 | Canada        | Risk of selected cancers due to occupational exposure to chlorinated solvents in a case-control study in Montreal                                              | J. Occup. Environ. Med.            | 198-208   | 2  | 55 |
| Clavel      | 1996 | France        | Hairy cell leukaemia and occupational exposure to benzene                                                                                                      | Occup Environ Med                  | 533-539   | 8  | 53 |
| Coble       | 2003 | Puerto Rico   | Sugarcane farming, occupational solvent exposures, and the risk of oral cancer in Puerto Rico                                                                  | J. Occup. Environ. Med.            | 869-874   | 8  | 45 |
| Cocco       | 1998 | US            | Occupational risk factors for cancer of the central nervous system: a case-control study on death certificates from 24 U.S. states                             | Am. J. Ind. Med.                   | 247-255   | 3  | 33 |
| Cocco       | 2013 | US            | Occupational exposure to trichloroethylene and risk of non-Hodgkin lymphoma and its major subtypes: a pooled InterLymph [correction of InterLymph] analysis    | Occup Environ Med                  | 795-802   | 11 | 70 |
| Cocco       | 1998 | International | Occupational risk factors for cancer of the gastric cardia. Analysis of death certificates from 24 US states                                                   | J. Occup. Environ. Med.            | 855-861   | 10 | 40 |
| Colt        | 2014 | US            | A case-control study of occupational exposure to metalworking fluids and bladder cancer risk among men                                                         | Occup Environ Med                  | 667-674   | 10 | 71 |
| Colt        | 2011 | US            | Occupation and bladder cancer in a population-based case-control study in Northern New England                                                                 | Occup Environ Med                  | 239-249   | 4  | 68 |
| Cordier     | 1993 | France        | Occupational risks of bladder cancer in France: a multicentre case-control study                                                                               | Int J Epidemiol                    | 403-411   | 3  | 22 |
| Costantini  | 2008 | Italy         | Risk of leukemia and multiple myeloma associated with exposure to benzene and other organic solvents: evidence from the Italian Multicenter Case-control study | Am. J. Ind. Med.                   | 803-811   | 11 | 51 |
| De Matteis  | 2012 | Italy         | Impact of occupational carcinogens on lung cancer risk in a general population                                                                                 | Int J Epidemiol                    | 711-721   | 3  | 41 |
| DellaValle  | 2015 |               | Validity of expert assigned retrospective estimates of occupational polychlorinated biphenyl exposure                                                          | Ann Occup Hyg                      | 609-615   | 5  | 59 |
| Demers      | 1994 | US            | Construction occupations, asbestos exposure, and cancer of the colon and rectum                                                                                | J Occup Med                        | 1027-1031 | 9  | 36 |
| Deng        | 2013 | US            | Occupational solvent exposure, genetic variation in immune genes, and the risk for non-Hodgkin lymphoma                                                        | Eur. J. Cancer Prev.               | 77-82     | 1  | 22 |

|              |      |           |                                                                                                                                                        |                            |           |    |     |
|--------------|------|-----------|--------------------------------------------------------------------------------------------------------------------------------------------------------|----------------------------|-----------|----|-----|
| Dietz        | 2004 | Germany   | Exposure to cement dust, related occupational groups and laryngeal cancer risk: results of a population based case-control study                       | Int. J. Cancer             | 907-911   | 6  | 108 |
| Dosemeci     | 1999 | US        | Gender differences in risk of renal cell carcinoma and occupational exposures to chlorinated aliphatic hydrocarbons                                    | Am. J. Ind. Med.           | 54-59     | 1  | 36  |
| Duell        | 2001 | US        | Reproducibility of reported farming activities and pesticide use among breast cancer cases and controls. A comparison of two modes of data collection  | Ann Epidemiol              | 178-185   | 3  | 11  |
| Dumas        | 2000 | Canada    | Rectal cancer and occupational risk factors: a hypothesis-generating, exposure-based case-control study                                                | Int. J. Cancer             | 874-879   | 6  | 87  |
| Eheman       | 1999 | US        | Estimating occupational radiation doses when individual dosimetry information is not available: a job exposure matrix                                  | Am. J. Ind. Med.           | 348-359   | 3  | 36  |
| Ekburanawat  | 2010 | Thailand  | Evaluation of non-viral risk factors for nasopharyngeal carcinoma in Thailand: results from a case-control study                                       | Asian Pac. J. Cancer Prev. | 929-932   | 4  | 11  |
| Ekpanyaskul  | 2015 | Thailand  | Semi-quantitative exposure assessment of occupational exposure to wood dust and nasopharyngeal cancer risk                                             | Asian Pac. J. Cancer Prev. | 4339-4345 | 10 | 16  |
| Ekstrom      | 1999 | Sweden    | Occupational exposures and risk of gastric cancer in a population-based case-control study                                                             | Cancer Res.                | 5932-5937 | 23 | 59  |
| Elghany      | 1990 | US        | Occupation, cadmium exposure, and prostate cancer                                                                                                      | Epidemiology               | 107-115   | 2  | 1   |
| El-Zaemey    | 2014 | Australia | Household and occupational exposure to pesticides and risk of breast cancer                                                                            | Int J Environ Health Res   | 91-102    | 2  | 24  |
| Eriksson     | 1992 | Sweden    | Occupational and other environmental factors and multiple myeloma: a population based case-control study                                               | Br J Ind Med               | 95-103    | 2  | 49  |
| Fabbro-Peray | 2001 | France    | Environmental risk factors for non-Hodgkin's lymphoma: a population-based case-control study in Languedoc-Roussillon, France                           | Cancer Causes Control      | 201-212   | 3  | 12  |
| Ferrante     | 2016 | Italy     | Pleural mesothelioma and occupational and non-occupational asbestos exposure: a case-control study with quantitative risk assessment                   | Occup Environ Med          | 147-153   | 3  | 73  |
| Fevotte      | 2006 | France    | Case-control study on renal cell cancer and occupational exposure to trichloroethylene. Part I: Exposure assessment                                    | Ann Occup Hyg              | 765-775   | 8  | 50  |
| Friesen      | 2014 | US        | Systematically extracting metal- and solvent-related occupational information from free-text responses to lifetime occupational history questionnaires | Ann Occup Hyg              | 612-624   | 5  | 58  |

|                |      |           |                                                                                                                                                                                                                   |                                    |         |   |     |
|----------------|------|-----------|-------------------------------------------------------------------------------------------------------------------------------------------------------------------------------------------------------------------|------------------------------------|---------|---|-----|
| Friesen        | 2014 | US        | Developing estimates of frequency and intensity of exposure to three types of metalworking fluids in a population-based case-control study of bladder cancer                                                      | Am. J. Ind. Med.                   | 915-927 | 8 | 57  |
| Friesen        | 2013 | US        | Comparison of algorithm-based estimates of occupational diesel exhaust exposure to those of multiple independent raters in a population-based case-control study                                                  | Ann Occup Hyg                      | 470-481 | 4 | 57  |
| Friesen        | 2015 | US        | Using hierarchical cluster models to systematically identify groups of jobs with similar occupational questionnaire response patterns to assist rule-based expert exposure assessment in population-based studies | Ann Occup Hyg                      | 455-466 | 4 | 59  |
| Fritschi       | 2005 | Australia | Occupational exposure to pesticides and risk of non-Hodgkin's lymphoma                                                                                                                                            | Am. J. Epidemiol.                  | 849-857 | 9 | 162 |
| Fritschi       | 2007 | Australia | Occupational risk factors for prostate cancer and benign prostatic hyperplasia: a case-control study in Western Australia                                                                                         | Occup Environ Med                  | 60-65   | 1 | 64  |
| Fritschi       | 1996 | Canada    | Lymphoma, myeloma and occupation: results of a case-control study                                                                                                                                                 | Int. J. Cancer                     | 498-503 | 4 | 67  |
| Fritschi       | 1996 | Canada    | Melanoma and occupation: results of a case-control study                                                                                                                                                          | Occup Environ Med                  | 168-173 | 3 | 53  |
| Fritschi       | 1996 | Canada    | Self-assessed versus expert-assessed occupational exposures                                                                                                                                                       | Am. J. Epidemiol.                  | 521-527 | 5 | 144 |
| Fritschi       | 2005 | Australia | Risk of non-Hodgkin lymphoma associated with occupational exposure to solvents, metals, organic dusts and PCBs (Australia)                                                                                        | Cancer Causes Control              | 599-607 | 5 | 16  |
| Fritschi       | 2015 | Australia | Occupational exposure to N-nitrosamines and pesticides and risk of pancreatic cancer                                                                                                                              | Occup Environ Med                  | 678-683 | 9 | 72  |
| Fritschi       | 2003 |           | Validation of expert assessment of occupational exposures                                                                                                                                                         | Am. J. Ind. Med.                   | 519-522 | 5 | 43  |
| Fryzek         | 1997 | US        | A case-control study of self-reported exposures to pesticides and pancreas cancer in southeastern Michigan                                                                                                        | Int. J. Cancer                     | 62-67   | 1 | 72  |
| Gago-Dominguez | 2001 | US        | Use of permanent hair dyes and bladder-cancer risk                                                                                                                                                                | Int. J. Cancer                     | 575-579 | 4 | 91  |
| Gallagher      | 1996 | Canada    | Chemical exposures, medical history, and risk of squamous and basal cell carcinoma of the skin                                                                                                                    | Cancer Epidemiol. Biomarkers Prev. | 419-424 | 6 | 5   |
| Garabedian     | 1999 | US        | Occupational chlorophenol exposure and non-Hodgkin's lymphoma                                                                                                                                                     | J. Occup. Environ. Med.            | 267-272 | 4 | 41  |

|            |      |           |                                                                                                                                                                    |                         |           |    |     |
|------------|------|-----------|--------------------------------------------------------------------------------------------------------------------------------------------------------------------|-------------------------|-----------|----|-----|
| Garabrant  | 1992 | US        | Asbestos and colon cancer: lack of association in a large case-control study                                                                                       | Am. J. Epidemiol.       | 843-853   | 8  | 135 |
| Gerin      | 1998 | Canada    | Associations between several sites of cancer and occupational exposure to benzene, toluene, xylene, and styrene: results of a case-control study in Montreal       | Am. J. Ind. Med.        | 144-156   | 2  | 34  |
| Gerin      | 1989 | Canada    | Cancer risks due to occupational exposure to formaldehyde: results of a multi-site case-control study in Montreal                                                  | Int. J. Cancer          | 53-58     | 1  | 44  |
| Glass      | 2015 | Australia | Occupational exposure to solvents and risk of breast cancer                                                                                                        | Am. J. Ind. Med.        | 915-922   | 9  | 58  |
| Goldberg   | 2001 | Canada    | A case-control study of the relationship between the risk of colon cancer in men and exposures to occupational agents                                              | Am. J. Ind. Med.        | 531-546   | 6  | 39  |
| Goldberg   | 1986 | Canada    | Inter-rater agreement in assessing occupational exposure in a case-control study                                                                                   | Br J Ind Med            | 667-676   | 10 | 43  |
| Grimsrud   | 1998 | Norway    | Lung and bladder cancer in a Norwegian municipality with iron and steel producing industry: population based case-control studies                                  | Occup Environ Med       | 387-392   | 6  | 55  |
| Guida      | 2013 | France    | Risk of lung cancer associated with occupational exposure to mineral wools: updating knowledge from a french population-based case-control study, the ICARE study  | J. Occup. Environ. Med. | 786-795   | 7  | 55  |
| Guo        | 2009 | China     | Evaluation of nonviral risk factors for nasopharyngeal carcinoma in a high-risk population of Southern China                                                       | Int. J. Cancer          | 2942-2947 | 12 | 124 |
| Gustavsson | 2002 | Sweden    | Low-dose exposure to asbestos and lung cancer: dose-response relations and interaction with smoking in a population-based case-referent study in Stockholm, Sweden | Am. J. Epidemiol.       | 1016-1022 | 11 | 155 |
| Hardell    | 2004 | Sweden    | Testicular cancer and occupational exposure to polyvinyl chloride plastics: a case-control study                                                                   | Int. J. Cancer          | 425-429   | 3  | 109 |
| Hardt      | 2014 | Canada    | A comparison of exposure assessment approaches: lung cancer and occupational asbestos exposure in a population-based case-control study                            | Occup Environ Med       | 282-288   | 4  | 71  |
| Hartge     | 1994 | US        | Occupation and ovarian cancer: a case-control study in the Washington, DC, metropolitan area, 1978-1981                                                            | J Occup Med             | 924-927   | 8  | 36  |
| Hayes      | 1990 | US        | Occupation and risk for testicular cancer: a case-control study                                                                                                    | Int J Epidemiol         | 825-831   | 4  | 19  |
| Hayes      | 1993 | US        | Are the known bladder cancer risk-factors associated with more advanced bladder cancer?                                                                            | Cancer Causes Control   | 157-162   | 2  | 4   |

|             |      |         |                                                                                                                                                                     |                                                  |           |    |     |
|-------------|------|---------|---------------------------------------------------------------------------------------------------------------------------------------------------------------------|--------------------------------------------------|-----------|----|-----|
| Heavner     | 2015 | US      | Working environment and myeloproliferative neoplasm: A population-based case-control study following a cluster investigation                                        | Am. J. Ind. Med.                                 | 595-604   | 6  | 58  |
| Heineman    | 1992 | Denmark | Occupational risk factors for multiple myeloma among Danish men                                                                                                     | Cancer Causes Control                            | 555-568   | 6  | 3   |
| Hinds       | 1985 | US      | Application of a job-exposure matrix to a case-control study of lung cancer                                                                                         | J. Natl. Cancer Inst.                            | 193-197   | 2  | 75  |
| Hoffmann    | 2008 | Germany | Population-based research on occupational and environmental factors for leukemia and non-Hodgkin's lymphoma: the Northern Germany Leukemia and Lymphoma Study (NLL) | Am. J. Ind. Med.                                 | 246-257   | 4  | 51  |
| Holly       | 1997 | US      | Non-Hodgkin's lymphoma in homosexual men in the San Francisco Bay Area: occupational, chemical, and environmental exposures                                         | J. Acquir. Immune Defic. Syndr. Hum. Retrovirol. | 223-231   | 3  | 15  |
| Hoppin      | 1999 | US      | Occupational risk factors for sarcoma subtypes                                                                                                                      | Epidemiology                                     | 300-306   | 3  | 10  |
| Horn-Ross   | 1997 | US      | Environmental factors and the risk of salivary gland cancer                                                                                                         | Epidemiology                                     | 414-419   | 4  | 8   |
| Hours       | 1994 | France  | Bladder cancer and occupational exposures                                                                                                                           | Scand J Work Environ Health                      | 322-330   | 5  | 20  |
| Howe        | 1980 | Canada  | Tobacco use, occupation, coffee, various nutrients, and bladder cancer                                                                                              | J. Natl. Cancer Inst.                            | 701-713   | 4  | 64  |
| Hu          | 1999 | Canada  | Risk factors for meningioma in adults: a case-control study in northeast China                                                                                      | Int. J. Cancer                                   | 299-304   | 3  | 83  |
| Hu          | 2002 | Canada  | Risk factors for lung cancer among Canadian women who have never smoked                                                                                             | Cancer Detect. Prev.                             | 129-138   | 2  | 26  |
| Hu          | 1999 | China   | When to be skeptical of negative studies: pitfalls in evaluating occupational risks using population-based case-control studies                                     | Can J Public Health                              | 138-142   | 2  | 90  |
| Iwatsubo    | 1998 | France  | Pleural mesothelioma: dose-response relation at low levels of asbestos exposure in a French population-based case-control study                                     | Am. J. Epidemiol.                                | 133-142   | 2  | 148 |
| Jansson     | 2006 | Sweden  | Airborne occupational exposures and risk of oesophageal and cardia adenocarcinoma                                                                                   | Occup Environ Med                                | 107-112   | 2  | 63  |
| Jarvholm    | 1993 | Sweden  | Quantitative importance of asbestos as a cause of lung cancer in a Swedish industrial city: a case-referent study                                                   | Eur. Respir. J.                                  | 1271-1275 | 9  | 6   |
| Jayaprakash | 2008 | US      | Wood dust exposure and the risk of upper aero-digestive and respiratory cancers in males                                                                            | Occup Environ Med                                | 647-654   | 10 | 65  |



|              |      |         |                                                                                                                                   |                             |           |    |     |
|--------------|------|---------|-----------------------------------------------------------------------------------------------------------------------------------|-----------------------------|-----------|----|-----|
| Ji           | 1999 | China   | Occupation and pancreatic cancer risk in Shanghai, China                                                                          | Am. J. Ind. Med.            | 76-81     | 1  | 35  |
| Ji           | 2001 | US      | Occupational exposure to pesticides and pancreatic cancer                                                                         | Am. J. Ind. Med.            | 92-99     | 1  | 39  |
| Jiao         | 2012 | US      | Occupational solvent exposure, genetic variation of DNA repair genes, and the risk of non-Hodgkin's lymphoma                      | Eur. J. Cancer Prev.        | 580-584   | 6  | 21  |
| Jockel       | 1998 | Germany | Occupational risk factors for lung cancer: a case-control study in West Germany                                                   | Int J Epidemiol             | 549-560   | 4  | 27  |
| Jockel       | 1998 | Germany | Lung cancer risk and welding: results from a case-control study in Germany                                                        | Am. J. Ind. Med.            | 313-320   | 4  | 33  |
| Johnson      | 2001 | US      | Lifetime residential and workplace exposure to environmental tobacco smoke and lung cancer in never-smoking women, Canada 1994-97 | Int. J. Cancer              | 902-906   | 6  | 93  |
| Johnson      | 1993 | Canada  | Data on prior pesticide use collected from self- and proxy respondents                                                            | Epidemiology                | 157-164   | 2  | 4   |
| Kachuri      | 2014 | Canada  | Occupational exposure to crystalline silica and the risk of lung cancer in Canadian men                                           | Int. J. Cancer              | 138-148   | 1  | 135 |
| Kachuri      | 2016 | Canada  | Workplace exposure to diesel and gasoline engine exhausts and the risk of colorectal cancer in Canadian men                       | Environ Health              | 4         | 1  | 15  |
| Kaerlev      | 2002 | EU      | Occupational risk factors for small bowel carcinoid tumor: a European population-based case-control study                         | J. Occup. Environ. Med.     | 516-522   | 6  | 44  |
| Karunanayake | 2008 | Canada  | Occupational exposures and non-Hodgkin's lymphoma: Canadian case-control study                                                    | Environ Health              | 44        |    | 7   |
| Karunanayake | 2012 | Canada  | Hodgkin lymphoma and pesticides exposure in men: a Canadian case-control study                                                    | J Agromedicine              | 30-39     | 1  | 17  |
| Kasim        | 2005 | Canada  | Environmental tobacco smoke and risk of adult leukemia                                                                            | Epidemiology                | 672-680   | 5  | 16  |
| Kato         | 2005 | US      | Personal and occupational exposure to organic solvents and risk of non-Hodgkin's lymphoma (NHL) in women (United States)          | Cancer Causes Control       | 1215-1224 | 10 | 16  |
| Kato         | 2004 | US      | Pesticide product use and risk of non-Hodgkin lymphoma in women                                                                   | Environ. Health Perspect.   | 1275-1281 | 13 | 112 |
| Kauppinen    | 1992 | Finland | Magnitude of misclassification bias when using a job-exposure matrix                                                              | Scand J Work Environ Health | 105-112   | 2  | 18  |
| Kauppinen    | 1992 | Finland | Primary liver cancer and occupational exposure                                                                                    | Scand J Work Environ Health | 18-25     | 1  | 18  |

|           |      |              |                                                                                                                                                                                                                         |                              |           |     |     |
|-----------|------|--------------|-------------------------------------------------------------------------------------------------------------------------------------------------------------------------------------------------------------------------|------------------------------|-----------|-----|-----|
| Kellen    | 2007 | Belgium      | Does occupational exposure to PAHs, diesel and aromatic amines interact with smoking and metabolic genetic polymorphisms to increase the risk on bladder cancer?; The Belgian case control study on bladder cancer risk | Cancer Lett.                 | 51-60     | 1-2 | 245 |
| Kernan    | 1999 | US           | Occupational risk factors for pancreatic cancer: a case-control study based on death certificates from 24 U.S. states                                                                                                   | Am. J. Ind. Med.             | 260-270   | 2   | 36  |
| Kiran     | 2010 | EU           | Occupational exposure to ethylene oxide and risk of lymphoma                                                                                                                                                            | Epidemiology                 | 905-910   | 6   | 21  |
| Kogevinas | 2003 | EU           | Occupation and bladder cancer among men in Western Europe                                                                                                                                                               | Cancer Causes Control        | 907-914   | 10  | 14  |
| Koh       | 2014 | US           | Calibrating a population-based job-exposure matrix using inspection measurements to estimate historical occupational exposure to lead for a population-based cohort in Shanghai, China                                  | J Expo Sci Environ Epidemiol | 9-16      | 1   | 24  |
| Kokouva   | 2013 | Greece       | Relationship between the paraoxonase 1 (PON1) M55L and Q192R polymorphisms and lymphohaematopoietic cancers in a Greek agricultural population                                                                          | Toxicology                   | 12-16     |     | 307 |
| Kreuzer   | 1999 | Germany      | Occupational risk factors for lung cancer among young men                                                                                                                                                               | Scand J Work Environ Health  | 422-429   | 5   | 25  |
| Krstev    | 2005 | Poland       | Occupation and risk of stomach cancer in Poland                                                                                                                                                                         | Occup Environ Med            | 318-324   | 5   | 62  |
| Lacourt   | 2014 | France       | Occupational and non-occupational attributable risk of asbestos exposure for malignant pleural mesothelioma                                                                                                             | Thorax                       | 532-539   | 6   | 69  |
| Lacourt   | 2013 | 13 countries | INTEROCC case-control study: lack of association between glioma tumors and occupational exposure to selected combustion products, dusts and other chemical agents                                                       | BMC Public Health            | 340       |     | 13  |
| Lacourt   | 2012 | France       | Temporal patterns of occupational asbestos exposure and risk of pleural mesothelioma                                                                                                                                    | Eur. Respir. J.              | 1304-1312 | 6   | 39  |
| Lacourt   | 2015 | Canada       | Lung cancer risk among workers in the construction industry: results from two case-control studies in Montreal                                                                                                          | BMC Public Health            | 941       |     | 15  |
| Lacourt   | 2010 | France       | Attributable risk in men in two French case-control studies on mesothelioma and asbestos                                                                                                                                | Eur. J. Epidemiol.           | 799-806   | 11  | 25  |
| Langevin  | 2013 | US           | Occupational dust exposure and head and neck squamous cell carcinoma risk in a population-based case-control study conducted in the greater Boston area                                                                 | Cancer Med                   | 978-986   | 6   | 2   |

|             |      |          |                                                                                                                                                     |                             |           |    |            |
|-------------|------|----------|-----------------------------------------------------------------------------------------------------------------------------------------------------|-----------------------------|-----------|----|------------|
| Langevin    | 2013 | US       | Occupational asbestos exposure is associated with pharyngeal squamous cell carcinoma in men from the greater Boston area                            | Occup Environ Med           | 858-863   | 12 | 70         |
| Latifovic   | 2015 | Canada   | Bladder cancer and occupational exposure to diesel and gasoline engine emissions among Canadian men                                                 | Cancer Med                  | 1948-1962 | 12 | 4          |
| Lee         | 2015 | Canada   | Statistical Modeling of Occupational Exposure to Polycyclic Aromatic Hydrocarbons Using OSHA Data                                                   | J Occup Environ Hyg         | 729-742   | 10 | 12         |
| Lee         | 2005 | US       | Agricultural pesticide use and risk of glioma in Nebraska, United States                                                                            | Occup Environ Med           | 786-792   | 11 | 62         |
| Lee         | 2006 | US       | Pesticide exposure and lung cancer mortality in Leningrad province in Russia                                                                        | Environ Int                 | 412-416   | 3  | 32         |
| Lee         | 2006 | Russia   | Asthma history, occupational exposure to pesticides and the risk of non-Hodgkin's lymphoma                                                          | Int. J. Cancer              | 3174-3176 | 12 | 118        |
| Linnet      | 1987 | US       | A case-control study of multiple myeloma in whites: chronic antigenic stimulation, occupation, and drug use                                         | Cancer Res.                 | 2978-2981 | 11 | 47         |
| Linnet      | 1987 | US       | Comparison of methods for determining occupational exposure in a case-control interview study of chronic lymphocytic leukemia                       | J Occup Med                 | 136-141   | 2  | 29         |
| Luce        | 1993 | France   | Sources of discrepancies between a job exposure matrix and a case by case expert assessment for occupational exposure to formaldehyde and wood-dust | Int J Epidemiol             | S113-120  |    | 22 Suppl 2 |
| Luce        | 2011 | France   | Investigation of occupational and environmental causes of respiratory cancers (ICARE): a multicenter, population-based case-control study in France | BMC Public Health           | 928       |    | 11         |
| Luqman      | 2014 | Pakistan | Risk factors for lung cancer in the Pakistani population                                                                                            | Asian Pac. J. Cancer Prev.  | 3035-3039 | 7  | 15         |
| Mahboubi    | 2013 | Canada   | Assessment of the effect of occupational exposure to formaldehyde on the risk of lung cancer in two Canadian population-based case-control studies  | Scand J Work Environ Health | 401-410   | 4  | 39         |
| 't Mannetje | 2003 | EU       | Assessing exposure misclassification by expert assessment in multicenter occupational studies                                                       | Epidemiology                | 585-592   | 5  | 14         |
| Mao         | 2000 | Canada   | Non-Hodgkin's lymphoma and occupational exposure to chemicals in Canada. Canadian Cancer Registries Epidemiology Research Group                     | Ann. Oncol.                 | 69-73     |    | 11 Suppl 1 |
| Marsh       | 1998 | US       | A case-control study of lung cancer mortality in four rural Arizona smelter towns                                                                   | Arch. Environ. Health       | 15-28     | 1  | 53         |

|           |      |               |                                                                                                                                                                           |                             |           |    |      |
|-----------|------|---------------|---------------------------------------------------------------------------------------------------------------------------------------------------------------------------|-----------------------------|-----------|----|------|
| Matos     | 2000 | Argentina     | Occupational exposures and lung cancer in Buenos Aires, Argentina                                                                                                         | J. Occup. Environ. Med.     | 653-659   | 6  | 42   |
| Matrat    | 2015 | France        | Occupational Exposure to Diesel Motor Exhaust and Lung Cancer: A Dose-Response Relationship Hidden by Asbestos Exposure Adjustment? The ICARE Study                       | J Cancer Epidemiol          | 879302    |    | 2015 |
| Matrat    | 2016 | France        | Welding, a risk factor of lung cancer: the ICARE study                                                                                                                    | Occup Environ Med           |           |    |      |
| Mattei    | 2014 | France        | Exposure to chlorinated solvents and lung cancer: results of the ICARE study                                                                                              | Occup Environ Med           | 681-689   | 10 | 71   |
| Maule     | 2007 | Italy         | Modeling mesothelioma risk associated with environmental asbestos exposure                                                                                                | Environ. Health Perspect.   | 1066-1071 | 7  | 115  |
| McClean   | 2011 | US            | A case-control study of asphalt and tar exposure and lung cancer in minorities                                                                                            | Am. J. Ind. Med.            | 811-818   | 11 | 54   |
| McHugh    | 2010 | US            | Assessing environmental and occupational risk factors for lung cancer in Mexican-Americans                                                                                | Cancer Causes Control       | 2157-2164 | 12 | 21   |
| Menvielle | 2003 | New Caledonia | Occupational exposures and lung cancer in New Caledonia                                                                                                                   | Occup Environ Med           | 584-589   | 8  | 60   |
| Menvielle | 2016 | France        | The joint effect of asbestos exposure, tobacco smoking and alcohol drinking on laryngeal cancer risk: evidence from the French population-based case-control study, ICARE | Occup Environ Med           | 28-33     | 1  | 73   |
| Merler    | 1986 | Italy         | On the causal association between exposure to leather dust and nasal cancer: further evidence from a case-control study                                                   | Br J Ind Med                | 91-95     | 2  | 43   |
| Merletti  | 1991 | Italy         | Occupation and cancer of the oral cavity or oropharynx in Turin, Italy                                                                                                    | Scand J Work Environ Health | 248-254   | 4  | 17   |
| Merletti  | 2006 | EU            | Occupational factors and risk of adult bone sarcomas: a multicentric case-control study in Europe                                                                         | Int. J. Cancer              | 721-727   | 3  | 118  |
| Miligi    | 2006 | Italy         | Occupational exposure to solvents and the risk of lymphomas                                                                                                               | Epidemiology                | 552-561   | 5  | 17   |
| Miligi    | 2003 | Italy         | Non-Hodgkin's lymphoma, leukemia, and exposures in agriculture: results from the Italian multicenter case-control study                                                   | Am. J. Ind. Med.            | 627-636   | 6  | 44   |
| Miligi    | 2006 | Italy         | Cancer and pesticides: an overview and some results of the Italian multicenter case-control study on hematolymphopoietic malignancies                                     | Ann. N. Y. Acad. Sci.       | 366-377   |    | 1076 |

|                       |      |               |                                                                                                                                                                                         |                                    |           |      |            |
|-----------------------|------|---------------|-----------------------------------------------------------------------------------------------------------------------------------------------------------------------------------------|------------------------------------|-----------|------|------------|
| Mirabelli             | 2000 | US            | Occupational exposure to chlorophenol and the risk of nasal and nasopharyngeal cancers among U.S. men aged 30 to 60                                                                     | Am. J. Ind. Med.                   | 532-541   | 5    | 37         |
| Mirabelli             | 2009 | Italy         | Occupational exposure to high molecular weight allergens and lymphoma risk among Italian adults                                                                                         | Cancer Epidemiol. Biomarkers Prev. | 2650-2654 | 10   | 18         |
| Mommsen               | 1984 | Denmark       | Occupational exposures as risk indicator of male bladder carcinoma in a predominantly rural area                                                                                        | Acta Radiol Oncol                  | 147-152   | 2-3  | 23         |
| Morabia               | 1992 | US            | Lung cancer and occupation: results of a multicentre case-control study                                                                                                                 | Br J Ind Med                       | 721-727   | 10   | 49         |
| Morales-Suarez-Varela | 2005 | EU            | Occupational exposures and mycosis fungoides. A European multicentre case-control study (Europe)                                                                                        | Cancer Causes Control              | 1253-1259 | 10   | 16         |
| Muscat                | 1998 | US            | Lung cancer risk and workplace exposures in black men and women                                                                                                                         | Environ. Res.                      | 78-84     | 2    | 76         |
| Nanni                 | 1996 | Italy         | Chronic lymphocytic leukaemias and non-Hodgkin's lymphomas by histological type in farming-animal breeding workers: a population case-control study based on a priori exposure matrices | Occup Environ Med                  | 652-657   | 10   | 53         |
| Navaranjan            | 2013 | Canada        | Exposures to multiple pesticides and the risk of Hodgkin lymphoma in Canadian men                                                                                                       | Cancer Causes Control              | 1661-1673 | 9    | 24         |
| Nordstrm              | 1998 | Sweden        | Occupational exposures, animal exposure and smoking as risk factors for hairy cell leukaemia evaluated in a case-control study                                                          | Br. J. Cancer                      | 2048-2052 | 11   | 77         |
| Nyberg                | 2000 | Sweden        | Urban air pollution and lung cancer in Stockholm                                                                                                                                        | Epidemiology                       | 487-495   | 5    | 11         |
| Ohlson                | 2000 | Sweden        | Testicular cancer and occupational exposures with a focus on xenoestrogens in polyvinyl chloride plastics                                                                               | Chemosphere                        | 1277-1282 | 9-11 | 40         |
| Olsson                | 2010 | EU            | Occupational exposure to polycyclic aromatic hydrocarbons and lung cancer risk: a multicenter study in Europe                                                                           | Occup Environ Med                  | 98-103    | 2    | 67         |
| Olsson                | 2011 | EU and Canada | Exposure to diesel motor exhaust and lung cancer risk in a pooled analysis from case-control studies in Europe and Canada                                                               | Am. J. Respir. Crit. Care Med.     | 941-948   | 7    | 183        |
| Orlowski              | 1993 | Germany       | Retrospective assessment of asbestos exposure--II. At the job level: complementarity of job-specific questionnaire and job exposure matrices                                            | Int J Epidemiol                    | S96-105   |      | 22 Suppl 2 |
| Orsi                  | 2010 | France        | Occupational exposure to organic solvents and lymphoid neoplasms in men: results of a French case-control study                                                                         | Occup Environ Med                  | 664-672   | 10   | 67         |

|           |      |         |                                                                                                                                                                            |                                    |           |    |     |
|-----------|------|---------|----------------------------------------------------------------------------------------------------------------------------------------------------------------------------|------------------------------------|-----------|----|-----|
| Pahwa     | 2011 | Canada  | Soft-tissue sarcoma and pesticides exposure in men: results of a Canadian case-control study                                                                               | J. Occup. Environ. Med.            | 1279-1286 | 11 | 53  |
| Pahwa     | 2006 | Canada  | Hodgkin lymphoma, multiple myeloma, soft tissue sarcomas, insect repellents, and phenoxyherbicides                                                                         | J. Occup. Environ. Med.            | 264-274   | 3  | 48  |
| Pannett   | 1985 | UK      | A job-exposure matrix for use in population based studies in England and Wales                                                                                             | Br J Ind Med                       | 777-783   | 11 | 42  |
| Parent    | 2000 | Canada  | Occupational risk factors for renal cell carcinoma in Montreal                                                                                                             | Am. J. Ind. Med.                   | 609-618   | 6  | 38  |
| Parent    | 1998 | Canada  | Occupational exposures and gastric cancer                                                                                                                                  | Epidemiology                       | 48-55     | 1  | 9   |
| Parent    | 2000 | Canada  | Workplace exposures and oesophageal cancer                                                                                                                                 | Occup Environ Med                  | 325-334   | 5  | 57  |
| Parent    | 1996 | Canada  | Case-control study of exposure to carbon black in the occupational setting and risk of lung cancer                                                                         | Am. J. Ind. Med.                   | 285-292   | 3  | 30  |
| Parent    | 2007 | Canada  | Exposure to diesel and gasoline engine emissions and the risk of lung cancer                                                                                               | Am. J. Epidemiol.                  | 53-62     | 1  | 165 |
| Paris     | 2010 | France  | Relationships between lung adenocarcinoma and gender, age, smoking and occupational risk factors: A case-case study                                                        | Lung Cancer                        | 146-153   | 2  | 68  |
| Park      | 2014 | US      | Estimation of the probability of exposure to machining fluids in a population-based case-control study                                                                     | J Occup Environ Hyg                | 757-770   | 11 | 11  |
| Partanen  | 1991 | Finland | Renal cell cancer and occupational exposure to chemical agents                                                                                                             | Scand J Work Environ Health        | 231-239   | 4  | 17  |
| Pastorino | 1984 | Italy   | Proportion of lung cancers due to occupational exposure                                                                                                                    | Int. J. Cancer                     | 231-237   | 2  | 33  |
| Pearce    | 1986 | US      | Non-Hodgkin's lymphoma and exposure to phenoxyherbicides, chlorophenols, fencing work, and meat works employment: a case-control study                                     | Br J Ind Med                       | 75-83     | 2  | 43  |
| Peplonska | 2010 | Poland  | Occupational exposure to organic solvents and breast cancer in women                                                                                                       | Occup Environ Med                  | 722-729   | 11 | 67  |
| Pesch     | 2000 | Germany | Occupational risk factors for urothelial carcinoma: agent-specific results from a case-control study in Germany. MURC Study Group. Multicenter Urothelial and Renal Cancer | Int J Epidemiol                    | 238-247   | 2  | 29  |
| Pesch     | 2013 | EU      | N-acetyltransferase 2 phenotype, occupation, and bladder cancer risk: results from the EPIC cohort                                                                         | Cancer Epidemiol. Biomarkers Prev. | 2055-2065 | 11 | 22  |

|           |      |               |                                                                                                                                                                    |                           |           |    |     |
|-----------|------|---------------|--------------------------------------------------------------------------------------------------------------------------------------------------------------------|---------------------------|-----------|----|-----|
| Peters    | 2014 | Australia     | Rule-based exposure assessment versus case-by-case expert assessment using the same information in a community-based study                                         | Occup Environ Med         | 215-219   | 3  | 71  |
| Peters    | 2012 | EU and Canada | Occupational exposure to organic dust increases lung cancer risk in the general population                                                                         | Thorax                    | 111-116   | 2  | 67  |
| Peters    | 2011 | EU            | Comparison of exposure assessment methods for occupational carcinogens in a multi-centre lung cancer case-control study                                            | Occup Environ Med         | 148-153   | 2  | 68  |
| Peters    | 2011 | Eu and Canada | Modelling of occupational respirable crystalline silica exposure for quantitative exposure assessment in community-based case-control studies                      | J. Environ. Monit.        | 3262-3268 | 11 | 13  |
| Peters    | 2016 | EU and Canada | SYN-JEM: A Quantitative Job-Exposure Matrix for Five Lung Carcinogens                                                                                              | Ann Occup Hyg             | mew034    |    |     |
| Pintos    | 2009 | Canada        | Risk of mesothelioma and occupational exposure to asbestos and man-made vitreous fibers: evidence from two case-control studies in Montreal, Canada                | J. Occup. Environ. Med.   | 1177-1184 | 10 | 51  |
| Pintos    | 2012 | Canada        | Occupational exposure to diesel engine emissions and risk of lung cancer: evidence from two case-control studies in Montreal, Canada                               | Occup Environ Med         | 787-792   | 11 | 69  |
| Pintos    | 2008 | Canada        | Occupational exposure to asbestos and man-made vitreous fibers, and risk of lung cancer: evidence from two case-control studies in Montreal, Canada                | J. Occup. Environ. Med.   | 1273-1281 | 11 | 50  |
| Pohlabeln | 2000 | Germany       | Lung cancer and exposure to man-made vitreous fibers: results from a pooled case-control study in Germany                                                          | Am. J. Ind. Med.          | 469-477   | 5  | 37  |
| Pohlabeln | 2002 | Germany       | Asbestos fibreyears and lung cancer: a two phase case-control study with expert exposure assessment                                                                | Occup Environ Med         | 410-414   | 6  | 59  |
| Preller   | 2010 | Netherlands   | Occupational exposure to silica and lung cancer risk in the Netherlands                                                                                            | Occup Environ Med         | 657-663   | 10 | 67  |
| Pronk     | 2012 | US            | Comparison of two expert-based assessments of diesel exhaust exposure in a case-control study: programmable decision rules versus expert review of individual jobs | Occup Environ Med         | 752-758   | 10 | 69  |
| Provost   | 2007 | France        | Brain tumours and exposure to pesticides: a case-control study in southwestern France                                                                              | Occup Environ Med         | 509-514   | 8  | 64  |
| Purdue    | 2009 | US            | Degreasing and risk of non-Hodgkin lymphoma                                                                                                                        | Occup Environ Med         | 557-560   | 8  | 66  |
| Purdue    | 2011 | US            | A case-control study of occupational exposure to trichloroethylene and non-Hodgkin lymphoma                                                                        | Environ. Health Perspect. | 232-238   | 2  | 119 |

|              |      |            |                                                                                                                                                   |                                    |           |    |     |
|--------------|------|------------|---------------------------------------------------------------------------------------------------------------------------------------------------|------------------------------------|-----------|----|-----|
| Rabstein     | 2010 | Germany    | N-acetyltransferase 2, exposure to aromatic and heterocyclic amines, and receptor-defined breast cancer                                           | Eur. J. Cancer Prev.               | 100-109   | 2  | 19  |
| Ramanakumar  | 2008 | Canada     | Risk of lung cancer following exposure to carbon black, titanium dioxide and talc: results from two case-control studies in Montreal              | Int. J. Cancer                     | 183-189   | 1  | 122 |
| Ramanakumar  | 2011 | Canada     | Exposures in painting-related occupations and risk of lung cancer among men: results from two case-control studies in Montreal                    | Occup Environ Med                  | 44-51     | 1  | 68  |
| Ramroth      | 2011 | Germany    | Occupational asbestos exposure as a risk factor for laryngeal carcinoma in a population-based case-control study from Germany                     | Am. J. Ind. Med.                   | 510-514   | 7  | 54  |
| Ramroth      | 2008 | Germany    | Occupational wood dust exposure and the risk of laryngeal cancer: a population based case-control study in Germany                                | Am. J. Ind. Med.                   | 648-655   | 9  | 51  |
| Rauscher     | 2003 | US, Canada | Is family history of breast cancer a marker of susceptibility to exposures in the incidence of de novo adult acute leukemia?                      | Cancer Epidemiol. Biomarkers Prev. | 289-294   | 4  | 12  |
| Richardson   | 2008 | Germany    | Occupational risk factors for non-Hodgkin's lymphoma: a population-based case-control study in Northern Germany                                   | Am. J. Ind. Med.                   | 258-268   | 4  | 51  |
| Richiardi    | 2006 | Italy      | Occupational exposure to diesel exhausts and risk for lung cancer in a population-based case-control study in Italy                               | Ann. Oncol.                        | 1842-1847 | 12 | 17  |
| Risch        | 1988 | Canada     | Occupational factors and the incidence of cancer of the bladder in Canada                                                                         | Br J Ind Med                       | 361-367   | 6  | 45  |
| Rodelsperger | 2001 | Germany    | Asbestos and man-made vitreous fibers as risk factors for diffuse malignant mesothelioma: results from a German hospital-based case-control study | Am. J. Ind. Med.                   | 262-275   | 3  | 39  |
| Rodvall      | 1996 | Sweden     | Glioma and occupational exposure in Sweden, a case-control study                                                                                  | Occup Environ Med                  | 526-532   | 8  | 53  |
| Rousseau     | 2007 | Canada     | Occupational exposure to lead compounds and risk of cancer among men: a population-based case-control study                                       | Am. J. Epidemiol.                  | 1005-1014 | 9  | 166 |
| Ruder        | 2004 | US         | Gliomas and farm pesticide exposure in men: the upper midwest health study                                                                        | Arch. Environ. Health              | 650-657   | 12 | 59  |
| Ruder        | 2013 | US         | The Upper Midwest Health Study: gliomas and occupational exposure to chlorinated solvents                                                         | Occup Environ Med                  | 73-80     | 2  | 70  |
| Russi        | 1997 | US         | Occupational exposure to machining fluids and laryngeal cancer risk: contrasting results using two separate control groups                        | Am. J. Ind. Med.                   | 166-171   | 2  | 31  |



|                     |      |                |                                                                                                                                          |                                    |           |    |     |
|---------------------|------|----------------|------------------------------------------------------------------------------------------------------------------------------------------|------------------------------------|-----------|----|-----|
| Rybicki             | 2006 | US             | Prostate cancer risk from occupational exposure to polycyclic aromatic hydrocarbons interacting with the GSTP1 Ile105Val polymorphism    | Cancer Detect. Prev.               | 412-422   | 5  | 30  |
| Sadetzki            | 2000 | Israel         | Selected risk factors for transitional cell bladder cancer                                                                               | Med. Oncol.                        | 179-182   | 3  | 17  |
| Samanic             | 2006 | Spain          | Smoking and bladder cancer in Spain: effects of tobacco type, timing, environmental tobacco smoke, and gender                            | Cancer Epidemiol. Biomarkers Prev. | 1348-1354 | 7  | 15  |
| Sasco               | 2002 | Morocco        | A case-control study of lung cancer in Casablanca, Morocco                                                                               | Cancer Causes Control              | 609-616   | 7  | 13  |
| Schlehofer          | 1995 | Germany        | Occupation, smoking and demographic factors, and renal cell carcinoma in Germany                                                         | Int J Epidemiol                    | 51-57     | 1  | 24  |
| Schlehofer          | 2005 | International  | Occupational risk factors for low grade and high grade glioma: results from an international case control study of adult brain tumours   | Int. J. Cancer                     | 116-125   | 1  | 113 |
| Schmeisser          | 2010 | EU             | Occupational exposure to pesticides and bile tract carcinoma in men: results from a European multicenter case-control study              | Cancer Causes Control              | 1493-1502 | 9  | 21  |
| Schmidt-Pokrzywniak | 2010 | Germany        | A case-control study: occupational cooking and the risk of uveal melanoma                                                                | BMC Ophthalmol                     | 26        |    | 10  |
| Schoenberg          | 1987 | US             | Occupation and lung cancer risk among New Jersey white males                                                                             | J. Natl. Cancer Inst.              | 13-21     | 1  | 79  |
| Schoenberg          | 1984 | US             | Case-control study of bladder cancer in New Jersey. I. Occupational exposures in white males                                             | J. Natl. Cancer Inst.              | 973-981   | 5  | 72  |
| Seidler             | 2010 | Germany, Italy | Asbestos exposure and malignant lymphoma: a multicenter case-control study in Germany and Italy                                          | Int Arch Occup Environ Health      | 563-570   | 5  | 83  |
| Siemiatycki         | 1989 | Canada         | Cancer risks associated with 10 inorganic dusts: results from a case-control study in Montreal                                           | Am. J. Ind. Med.                   | 547-567   | 5  | 16  |
| Siemiatycki         | 1994 | Canada         | Occupational risk factors for bladder cancer: results from a case-control study in Montreal, Quebec, Canada                              | Am. J. Epidemiol.                  | 1061-1080 | 12 | 140 |
| Siemiatycki         | 1997 | Canada         | Reliability of an expert rating procedure for retrospective assessment of occupational exposures in community-based case-control studies | Am. J. Ind. Med.                   | 280-286   | 3  | 31  |
| Simpson             | 1998 | US             | Wood-dust exposures and cancer of the colon                                                                                              | Int J Occup Environ Health         | 179-183   | 3  | 4   |
| Smith               | 1992 | Australia      | Phenoxy herbicides and chlorophenols: a case control study on soft tissue sarcoma and malignant lymphoma                                 | Br. J. Cancer                      | 442-448   | 3  | 65  |

|             |      |         |                                                                                                                                              |                                    |           |    |            |
|-------------|------|---------|----------------------------------------------------------------------------------------------------------------------------------------------|------------------------------------|-----------|----|------------|
| Soskolne    | 2011 | Canada  | A population-based case-control study of occupational exposure to acids and the risk of lung cancer: evidence for specificity of association | Int J Occup Environ Health         | 1-8       | 1  | 17         |
| Spinelli    | 2010 | France  | Occupational and environmental risk factors for brain cancer: a pilot case-control study in France                                           | Presse Med                         | e35-44    | 2  | 39         |
| Steineck    | 1990 | Sweden  | Increased risk of urothelial cancer in Stockholm during 1985-87 after exposure to benzene and exhausts                                       | Int. J. Cancer                     | 1012-1017 | 6  | 45         |
| Stengel     | 1993 | France  | Retrospective evaluation of occupational exposure to organic solvents: questionnaire and job exposure matrix                                 | Int J Epidemiol                    | S72-82    |    | 22 Suppl 2 |
| Strom       | 2008 | US      | Prostate cancer in Mexican-Americans: identification of risk factors                                                                         | Prostate                           | 563-570   | 5  | 68         |
| Swerdlow    | 1991 | England | Cancer of the testis, socioeconomic status, and occupation                                                                                   | Br J Ind Med                       | 670-674   | 10 | 48         |
| 't Mannetje | 2011 | EU      | Occupational exposure to metal compounds and lung cancer. Results from a multi-center case-control study in Central/Eastern Europe and UK    | Cancer Causes Control              | 1669-1680 | 12 | 22         |
| 't Mannetje | 2012 | EU      | Welding and lung cancer in Central and Eastern Europe and the United Kingdom                                                                 | Am. J. Epidemiol.                  | 706-714   | 7  | 175        |
| Talibov     | 2014 | Nordic  | Occupational exposure to solvents and acute myeloid leukemia: a population-based, case-control study in four Nordic countries                | Scand J Work Environ Health        | 511-517   | 5  | 40         |
| Tatham      | 1997 | US      | Occupational risk factors for subgroups of non-Hodgkin's lymphoma                                                                            | Epidemiology                       | 551-558   | 5  | 8          |
| Theis       | 2008 | US      | Smoking, environmental tobacco smoke, and risk of renal cell cancer: a population-based case-control study                                   | BMC Cancer                         | 387       |    | 8          |
| Tinnerberg  | 2001 | Sweden  | Evaluation of occupational and leisure time exposure assessment in a population-based case control study on leukaemia                        | Int Arch Occup Environ Health      | 533-540   | 8  | 74         |
| Tinnerberg  | 2003 | EU      | Retrospective exposure assessment and quality control in an international multi-centre case-control study                                    | Ann Occup Hyg                      | 37-47     | 1  | 47         |
| Tranah      | 2009 | US      | Solvent exposure and non-Hodgkin lymphoma: no risk in a population-based study in the San Francisco Bay Area                                 | Cancer Epidemiol. Biomarkers Prev. | 3130-3132 | 11 | 18         |
| Tsuda       | 2001 | Japan   | A case-control study of the relationships among silica exposure, gastric cancer, and esophageal cancer                                       | Am. J. Ind. Med.                   | 52-57     | 1  | 39         |

|            |      |             |                                                                                                                                                          |                                    |           |    |     |
|------------|------|-------------|----------------------------------------------------------------------------------------------------------------------------------------------------------|------------------------------------|-----------|----|-----|
| Ugnat      | 2004 | Canada      | Occupational exposure to chemical and petrochemical industries and bladder cancer risk in four western Canadian provinces                                | Chronic Dis Can                    | 7-15      | 2  | 25  |
| Vajdic     | 2007 | Australia   | Atopy, exposure to pesticides and risk of non-Hodgkin lymphoma                                                                                           | Int. J. Cancer                     | 2271-2274 | 10 | 120 |
| Vallieres  | 2012 | Canada      | Exposure to welding fumes increases lung cancer risk among light smokers but not among heavy smokers: evidence from two case-control studies in Montreal | Cancer Med                         | 47-58     | 1  | 1   |
| Vallieres  | 2015 | Canada      | Occupational exposure to wood dust and risk of lung cancer in two population-based case-control studies in Montreal, Canada                              | Environ Health                     | 1         |    | 14  |
| van Loon   | 1997 | Netherlands | Occupational exposure to carcinogens and risk of lung cancer: results from The Netherlands cohort study                                                  | Occup Environ Med                  | 817-824   | 11 | 54  |
| Vaughan    | 1997 | US          | Work in dry cleaning and the incidence of cancer of the oral cavity, larynx, and oesophagus                                                              | Occup Environ Med                  | 692-695   | 9  | 54  |
| Vaughan    | 2000 | US          | Occupational exposure to formaldehyde and wood dust and nasopharyngeal carcinoma                                                                         | Occup Environ Med                  | 376-384   | 6  | 57  |
| Vaughan    | 1986 | US          | Formaldehyde and cancers of the pharynx, sinus and nasal cavity: I. Occupational exposures                                                               | Int. J. Cancer                     | 677-683   | 5  | 38  |
| Vida       | 2010 | Canada      | Occupational exposure to silica and lung cancer: pooled analysis of two case-control studies in Montreal, Canada                                         | Cancer Epidemiol. Biomarkers Prev. | 1602-1611 | 6  | 19  |
| Villeneuve | 2004 | Canada      | Environmental tobacco smoke and the risk of pancreatic cancer: findings from a Canadian population-based case-control study                              | Can J Public Health                | 32-37     | 1  | 95  |
| Villeneuve | 2012 | Canada      | Occupational exposure to asbestos and lung cancer in men: evidence from a population-based case-control study in eight Canadian provinces                | BMC Cancer                         | 595       |    | 12  |
| Villeneuve | 2011 | Canada      | Occupational exposure to diesel and gasoline emissions and lung cancer in Canadian men                                                                   | Environ. Res.                      | 727-735   | 5  | 111 |
| Vineis     | 1985 | Italy       | Occupation and bladder cancer in males: a case-control study                                                                                             | Int. J. Cancer                     | 599-606   | 5  | 35  |
| Vizcaya    | 2013 | Canada      | Risk of lung cancer associated with six types of chlorinated solvents: results from two case-control studies in Montreal, Canada                         | Occup Environ Med                  | 81-85     | 2  | 70  |
| Wang       | 2009 | US          | Occupational exposure to solvents and risk of non-Hodgkin lymphoma in Connecticut women                                                                  | Am. J. Epidemiol.                  | 176-185   | 2  | 169 |

|         |      |        |                                                                                                                                                                 |                                    |           |    |     |
|---------|------|--------|-----------------------------------------------------------------------------------------------------------------------------------------------------------------|------------------------------------|-----------|----|-----|
| Wheeler | 2013 | US     | Inside the black box: starting to uncover the underlying decision rules used in a one-by-one expert assessment of occupational exposure in case-control studies | Occup Environ Med                  | 203-210   | 3  | 70  |
| Wild    | 2012 | France | Occupational risk factors have to be considered in the definition of high-risk lung cancer populations                                                          |                                    | 1346-1352 | 7  | 106 |
| Wild    | 2016 | France | The 2-phase case-control design: an efficient way to use expert-time                                                                                            | Scand J Work Environ Health        |           |    |     |
| Wilson  | 2004 | US     | Occupational exposures and salivary gland cancer mortality among African American and white workers in the United States                                        | J. Occup. Environ. Med.            | 287-297   | 3  | 46  |
| Wortley | 1992 | US     | A case-control study of occupational risk factors for laryngeal cancer                                                                                          | Br J Ind Med                       | 837-844   | 12 | 49  |
| Wu      | 1995 | US     | A case-control study of wood dust exposure, mutagen sensitivity, and lung cancer risk                                                                           | Cancer Epidemiol. Biomarkers Prev. | 583-588   | 6  | 4   |
| Wynant  | 2013 | Canada | Occupational exposure to lead and lung cancer: results from two case-control studies in Montreal, Canada                                                        | Occup Environ Med                  | 164-170   | 3  | 70  |
| Yiin    | 2012 | US     | The Upper Midwest Health Study: a case-control study of pesticide applicators and risk of glioma                                                                | Environ Health                     | 39        |    | 11  |
| Young   | 2005 | US     | Triazine herbicides and epithelial ovarian cancer risk in central California                                                                                    | J. Occup. Environ. Med.            | 1148-1156 | 11 | 47  |
| Yu      | 1990 | China  | Occupational and other non-dietary risk factors for nasopharyngeal carcinoma in Guangzhou, China                                                                | Int. J. Cancer                     | 1033-1039 | 6  | 45  |
| Zahm    | 1993 | US     | The role of agricultural pesticide use in the development of non-Hodgkin's lymphoma in women                                                                    | Arch. Environ. Health              | 353-358   | 5  | 48  |
| Zheng   | 2001 | China  | Agricultural exposure to carbamate pesticides and risk of non-Hodgkin lymphoma                                                                                  | J. Occup. Environ. Med.            | 641-649   | 7  | 43  |
| Zheng   | 1992 | China  | A population-based case-control study of cancers of the nasal cavity and paranasal sinuses in Shanghai                                                          | Int. J. Cancer                     | 557-561   | 4  | 52  |
| Zheng   | 1992 | China  | Diet and other risk factors for laryngeal cancer in Shanghai, China                                                                                             | Am. J. Epidemiol.                  | 178-191   | 2  | 136 |
| Zheng   | 1996 | US     | Diet and other risk factors for cancer of the salivary glands: a population-based case-control study                                                            | Int. J. Cancer                     | 194-198   | 2  | 67  |
| Zhong   | 1999 | China  | A case-control study of lung cancer and environmental tobacco smoke among nonsmoking women living in Shanghai, China                                            | Cancer Causes Control              | 607-616   | 6  | 10  |

|     |      |    |                                                                                                                              |                |         |   |    |
|-----|------|----|------------------------------------------------------------------------------------------------------------------------------|----------------|---------|---|----|
| Zhu | 2002 | US | Case-control study evaluating the homogeneity and heterogeneity of risk factors between sinonasal and nasopharyngeal cancers | Int. J. Cancer | 119-123 | 1 | 99 |
|-----|------|----|------------------------------------------------------------------------------------------------------------------------------|----------------|---------|---|----|

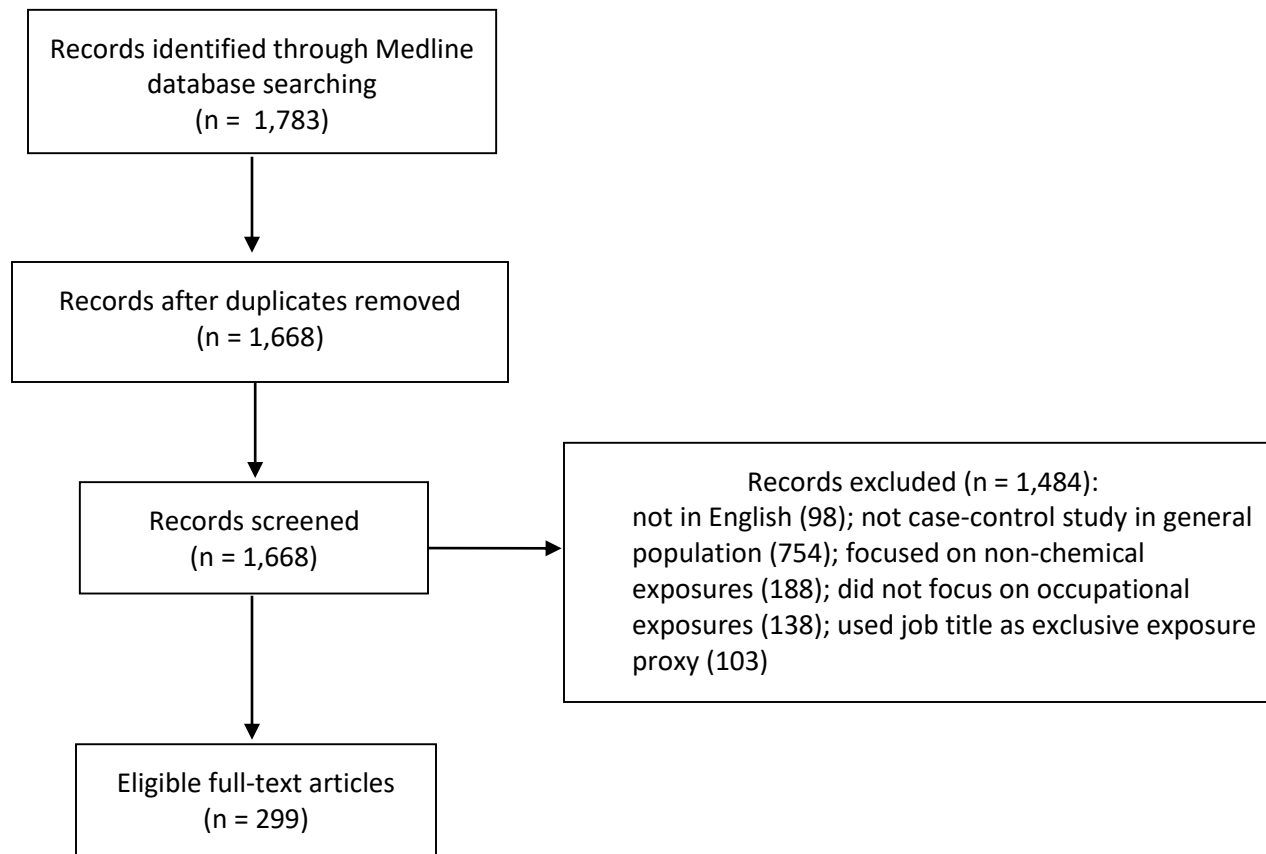

Figure S1: Prisma diagram for systematic review of occupational cancer case-control studies of chemical agents in the general population

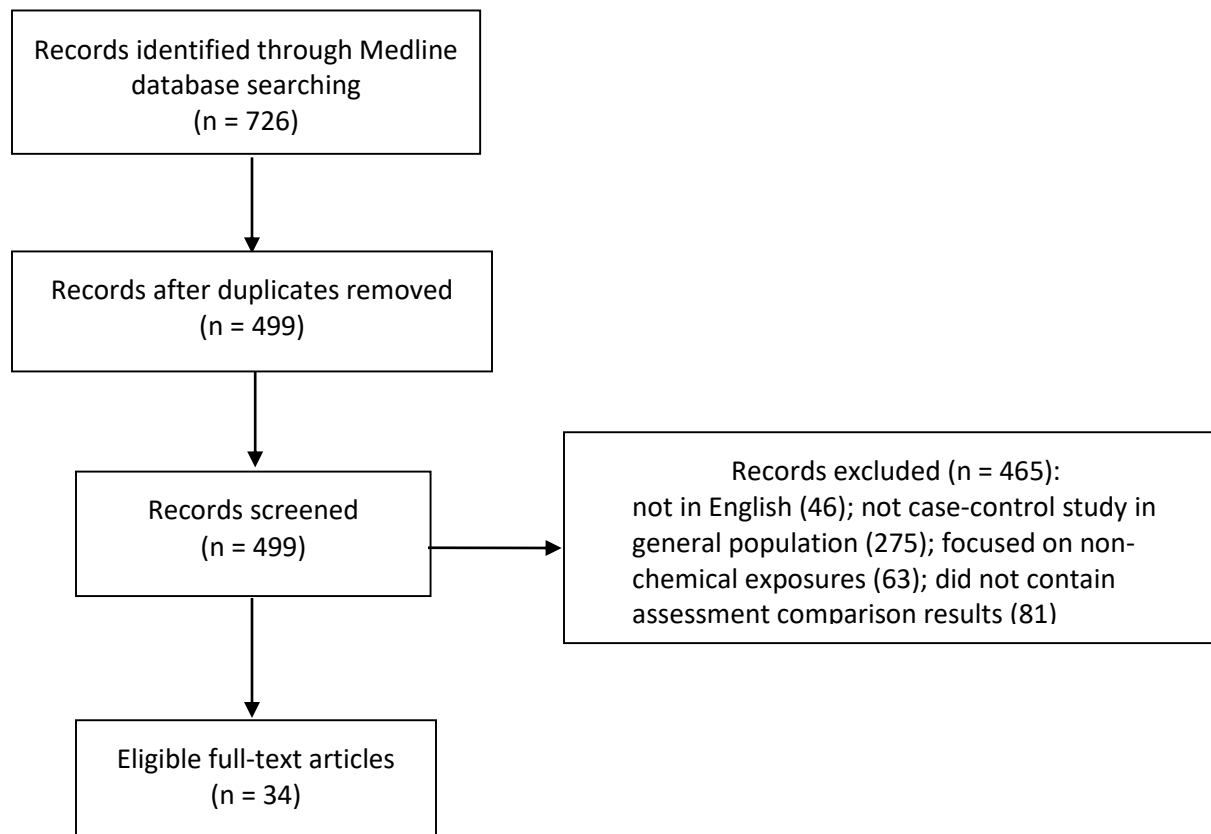

Figure S2: Prisma diagram for systematic review of retrospective occupational exposure assessment reliability comparison studies, where assessment was performed for chemicals in case-control studies in the general population

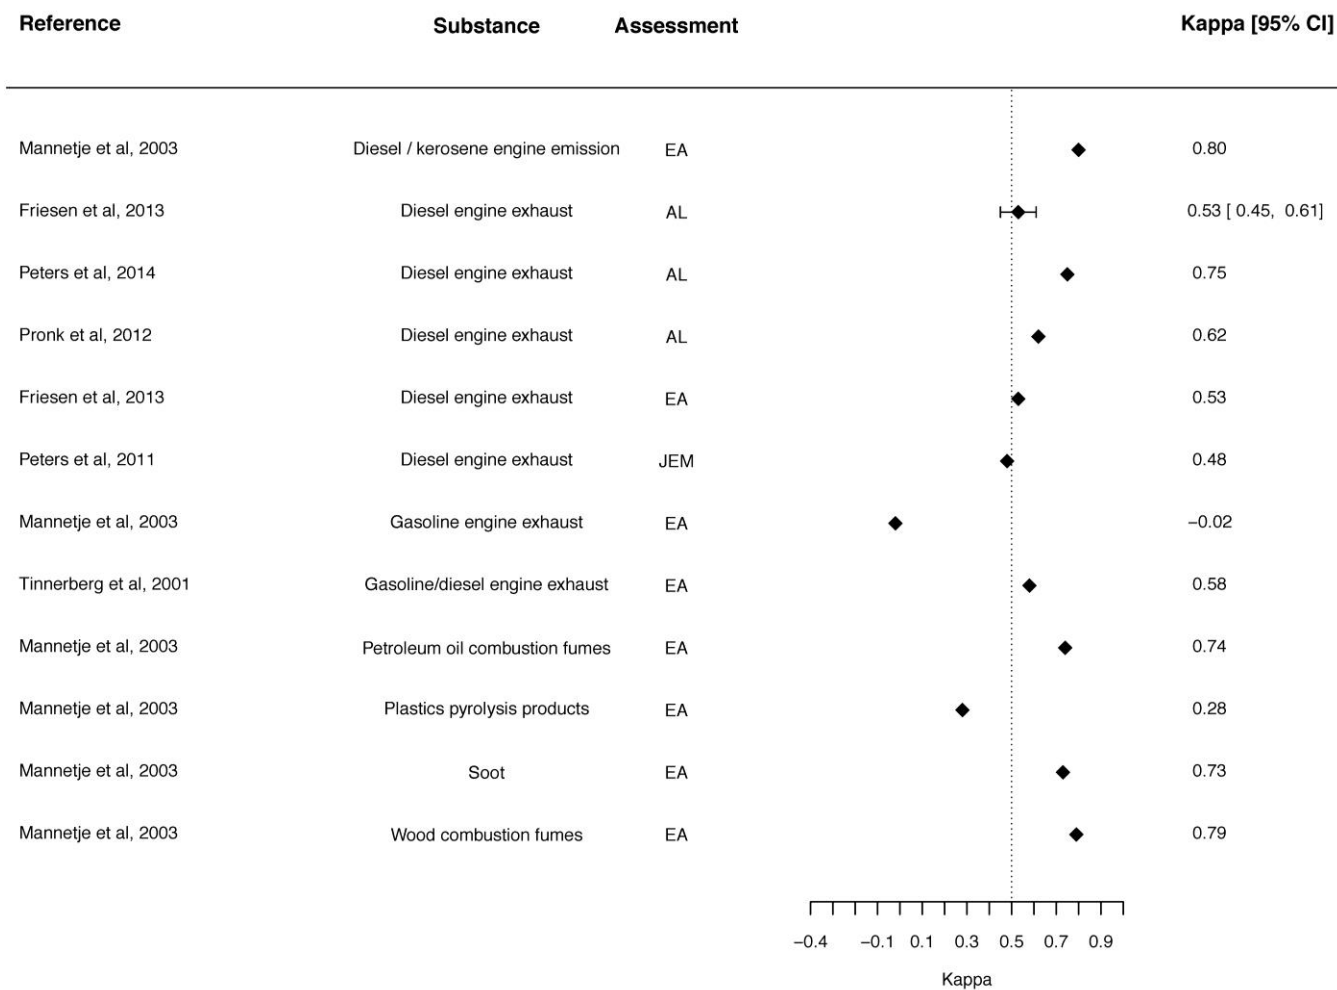

Figure S3: Forest plot of unweighted kappa values and 95% confidence intervals (95% CI) by substance (combustion products) and assessment method (AL = algorithmic assessment; EA = case-by-case expert assessment; JEM = job-exposure matrix) with case-by-case expert assessment as comparison reference



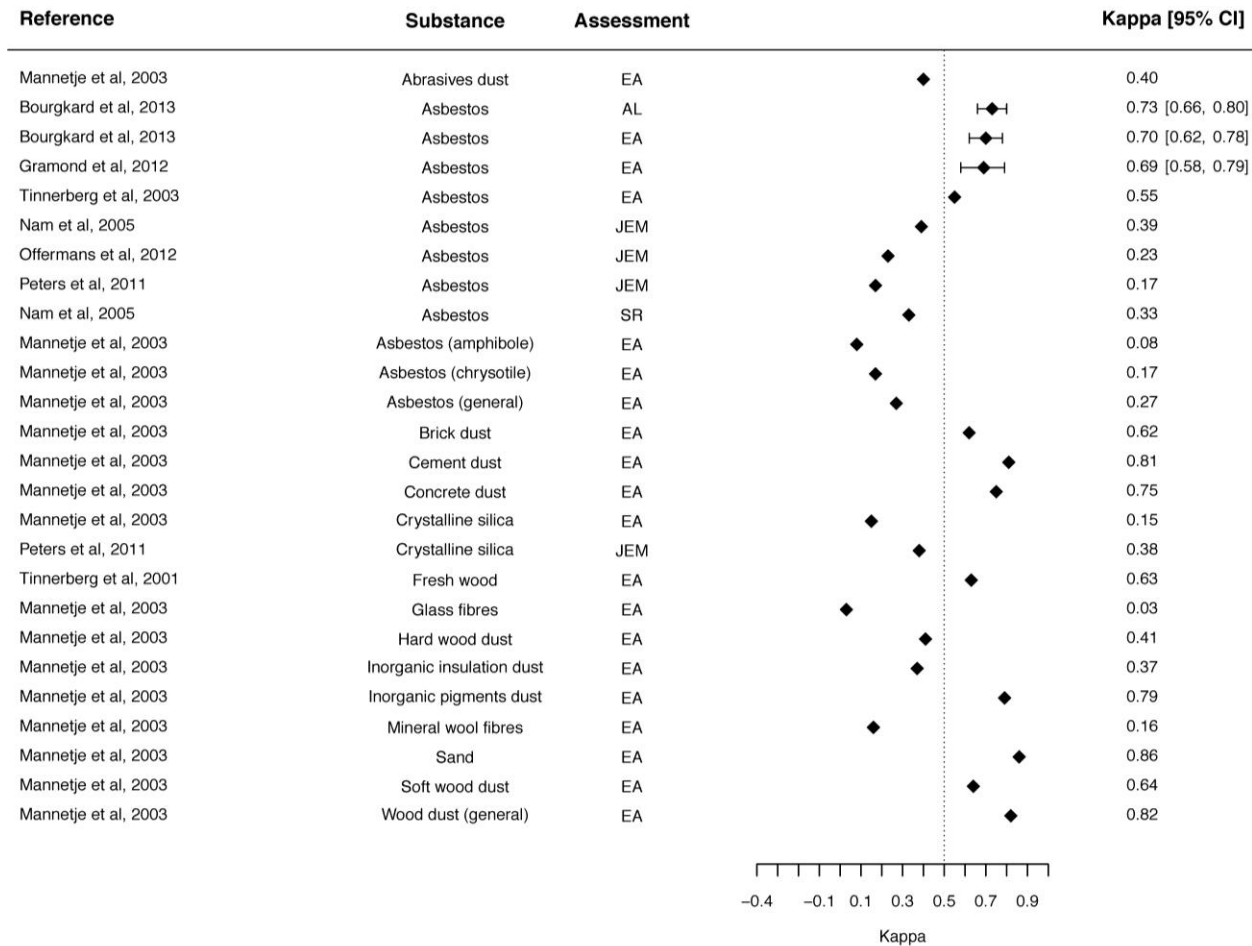

Figure S4: Forest plot of unweighted kappa values and 95% confidence intervals (95% CI) by substance (fibres and dusts) and assessment method (AL = algorithmic assessment; EA = case-by-case expert assessment; JEM = job-exposure matrix; SR = self-report) with case-by-case expert assessment as comparison reference

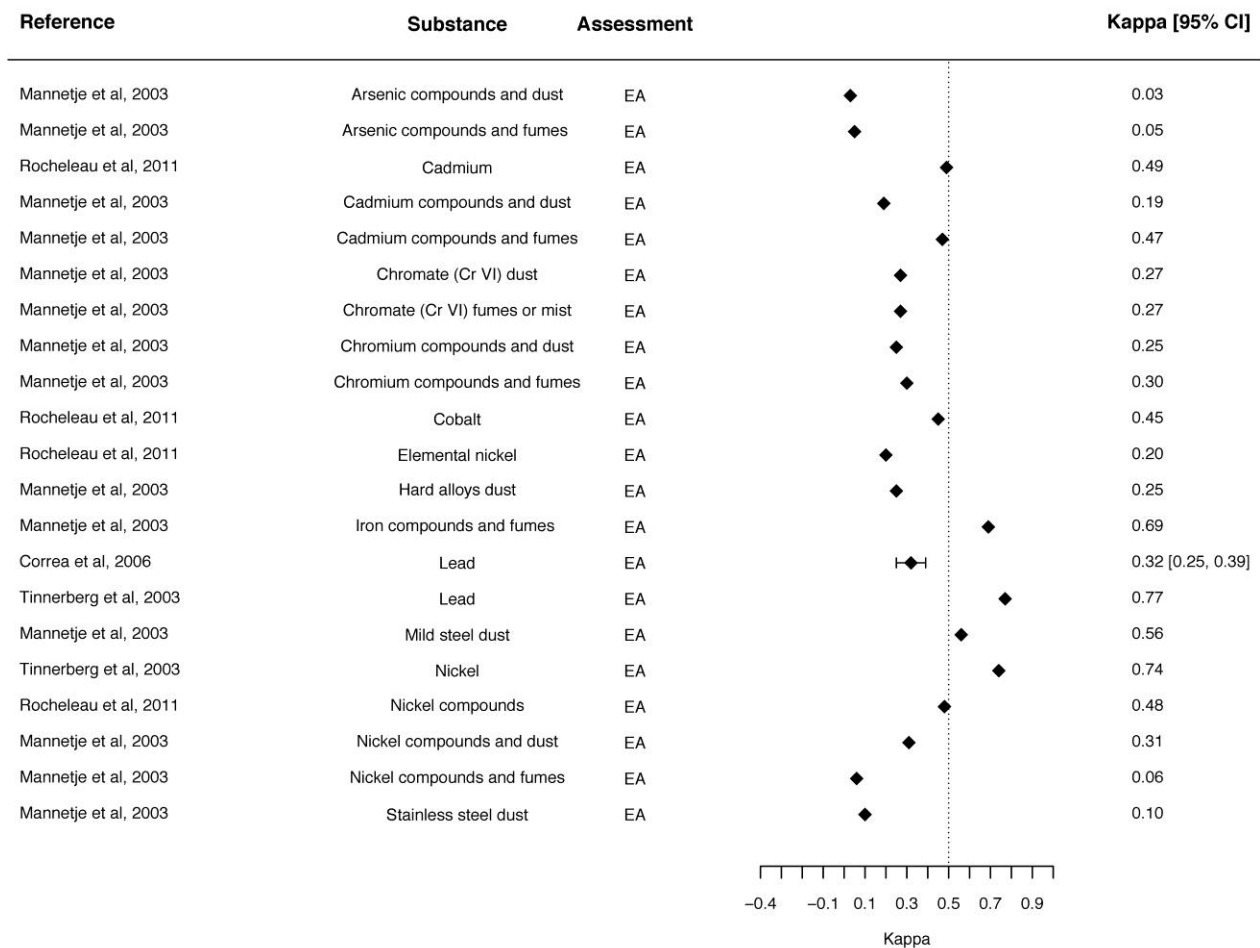

Figure S5: Forest plot of unweighted kappa values and 95% confidence intervals (95% CI) by substance (metals) and assessment method (EA = case-by-case expert assessment) with case-by-case expert assessment as comparison reference

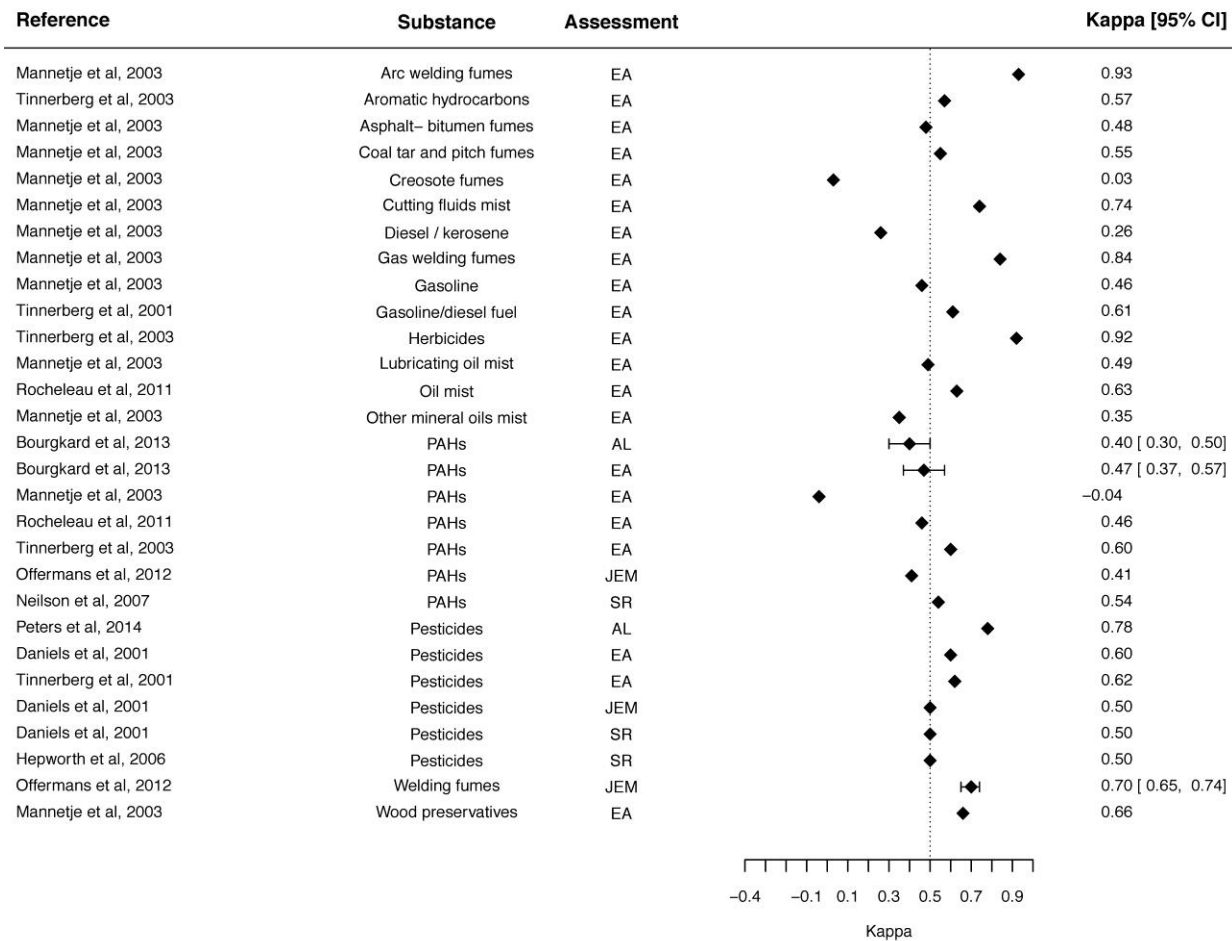

Figure S6: Forest plot of unweighted kappa values and 95% confidence intervals (95% CI) by substance (mixtures) and assessment method (EA = case-by-case expert assessment; JEM = job-exposure matrix; SR = self-report) with case-by-case expert assessment as comparison reference

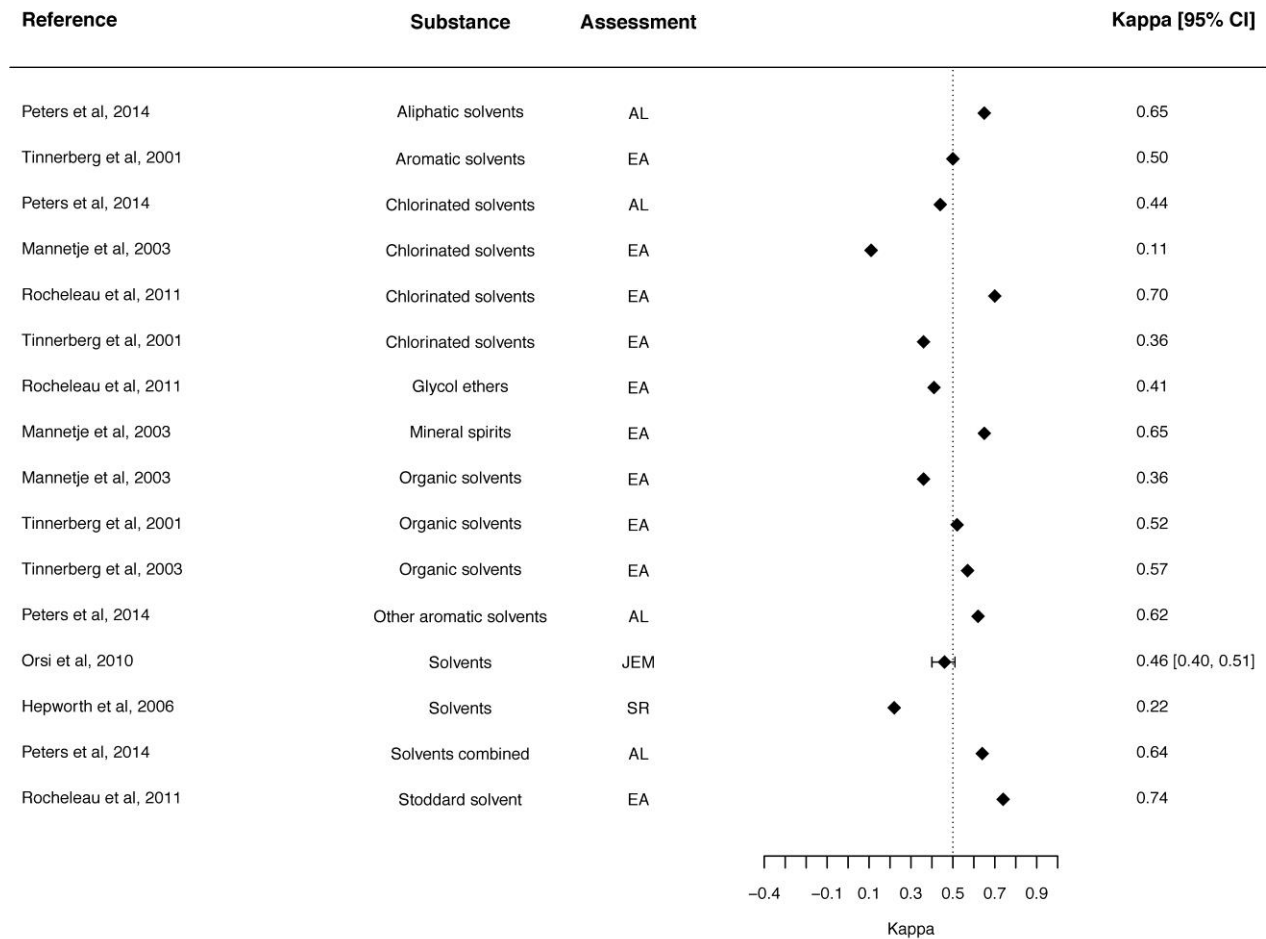

Figure S7: Forest plot of unweighted kappa values and 95% confidence intervals (95% CI) by substance (solvents) and assessment method (AL = algorithmic assessment; EA = case-by-case expert assessment; JEM = job-exposure matrix; SR = self-report) with case-by-case expert assessment as comparison reference

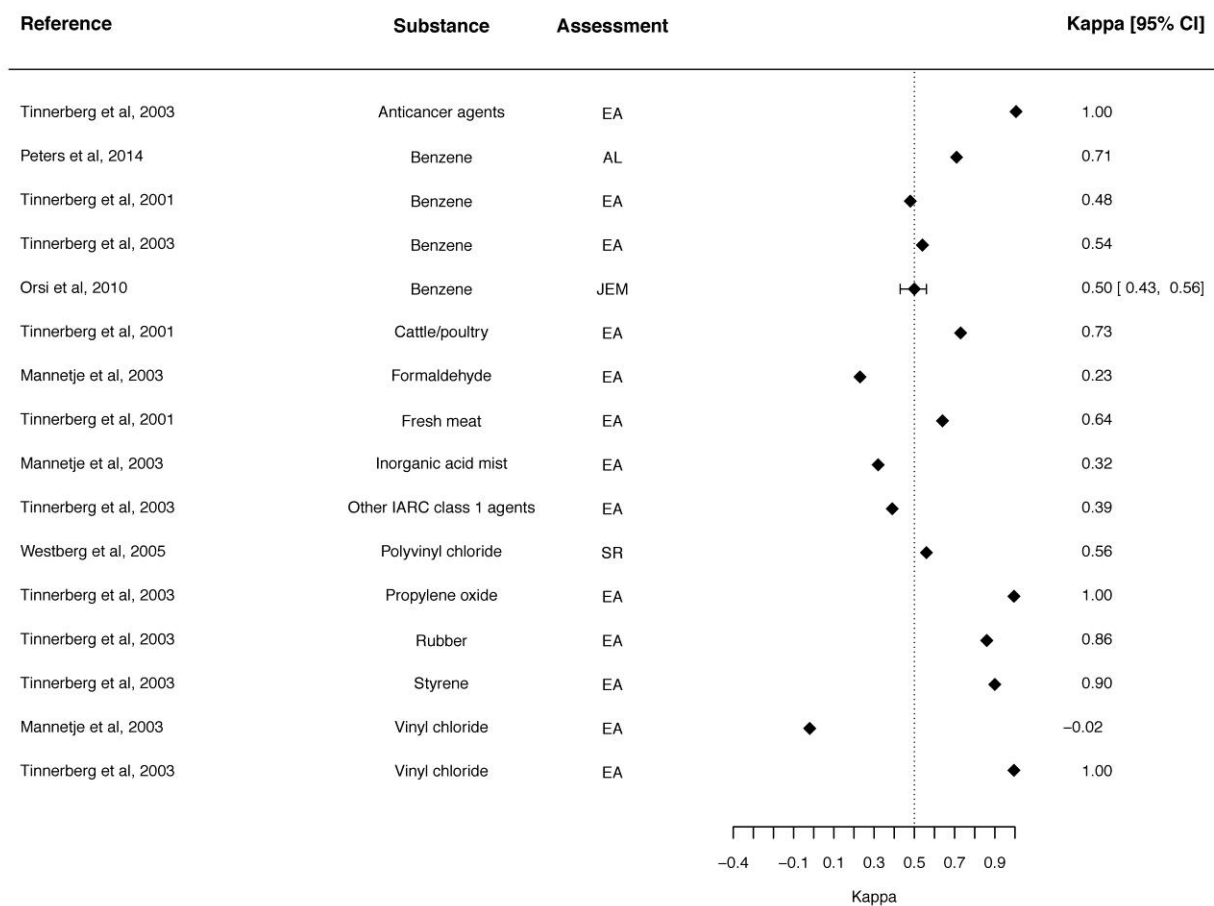

Figure S8: Forest plot of unweighted kappa values and 95% confidence intervals (95% CI) by substance (others) and assessment method (AL = algorithmic assessment; EA = case-by-case expert assessment; JEM = job-exposure matrix; SR = self-report) with case-by-case expert assessment as comparison reference
